# Supplementary material
Source: PubMed Central journal article supplement (PMC4744554)
Supplement: NIHMS744362-supplement-1.pdf [file NIHMS744362-supplement-1.pdf]

**Figure S1.**

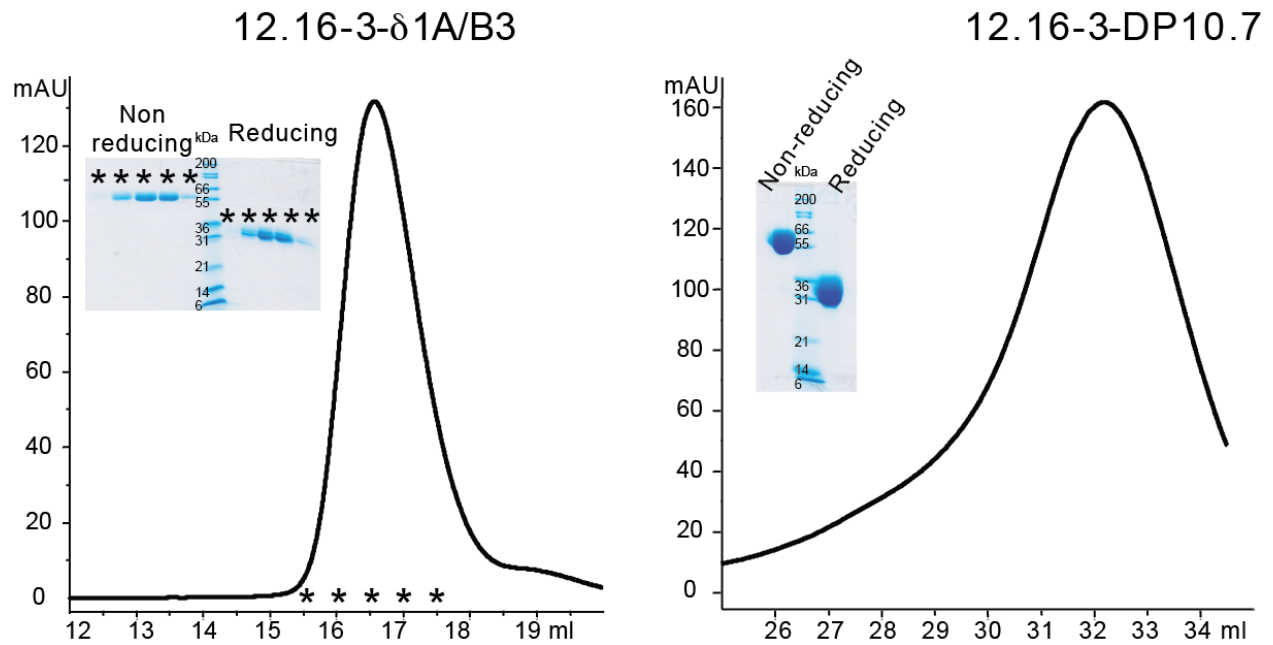

Figure S1: Expression and size exclusion chromatography purification of CDR3  $\delta$  loop swapped TCRs. Superdex S200 gel filtration purification profiles of chain swapped TCRs are shown with SDS-PAGE (non-reducing and reducing conditions).

**Figure S2.**

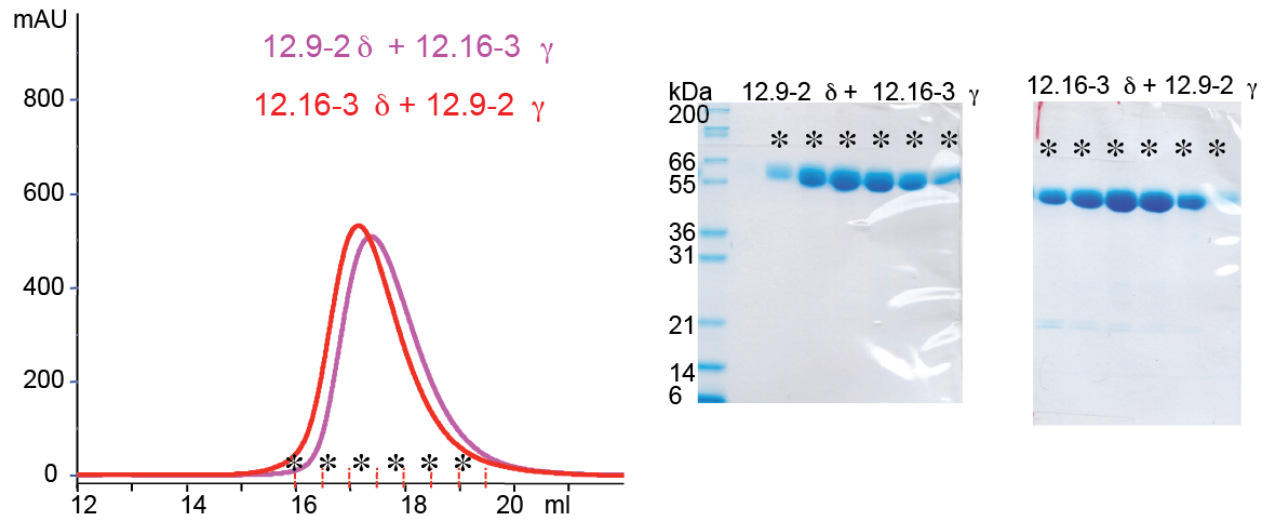

Figure S2: Expression and size exclusion chromatography of  $\gamma$ -chain swapped TCRs. Superdex S200 gel filtration purification profiles of chain swapped TCRs are shown with SDS-PAGE (non-reducing condition).

**Figure S3.**

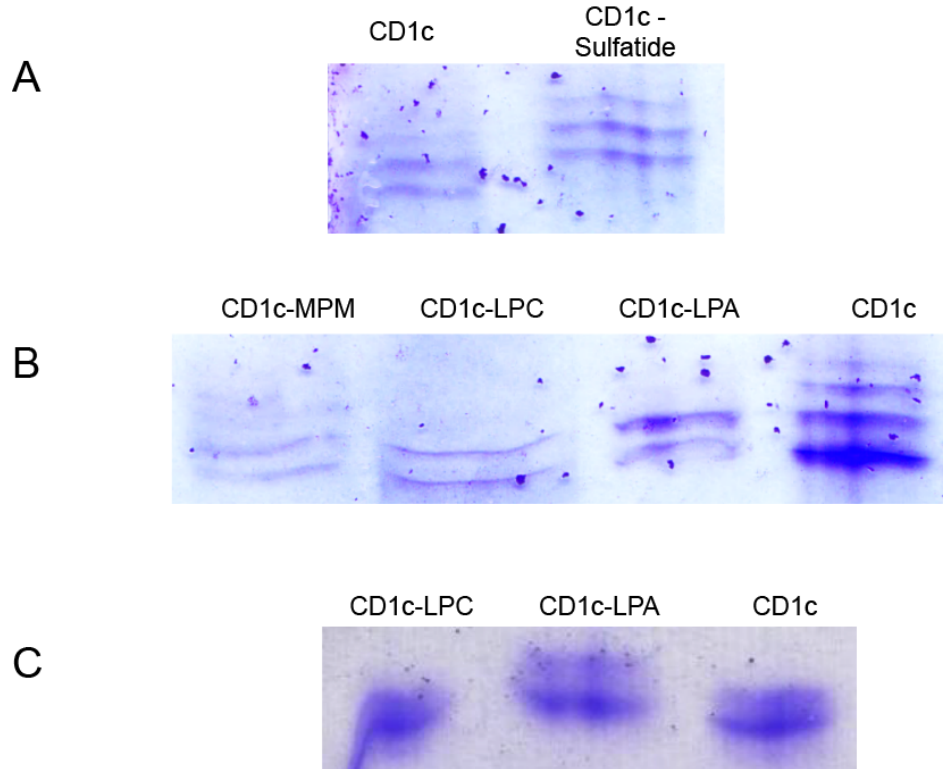

Figure S3: Loading of CD1c molecule with lipids. CD1c loaded with mixed sulfatide and run on isoelectric focusing (IEF) gel 3-9 (A), CD1c loaded with MPM and then incubated with LPC and run on IEF 3-9 (B), CD1c loaded with LPA and run on IEF 3-9 (B), CD1c loaded with LPC, LPA and run on IEF 3-9 (C).
